# Supplementary material for: Oral Gavage Delivery of Stable Isotope Tracer for In Vivo Metabolomics
Source: MDPI journal article supplement (doi:10.3390/metabo10120501), 2020-12-08

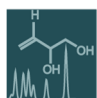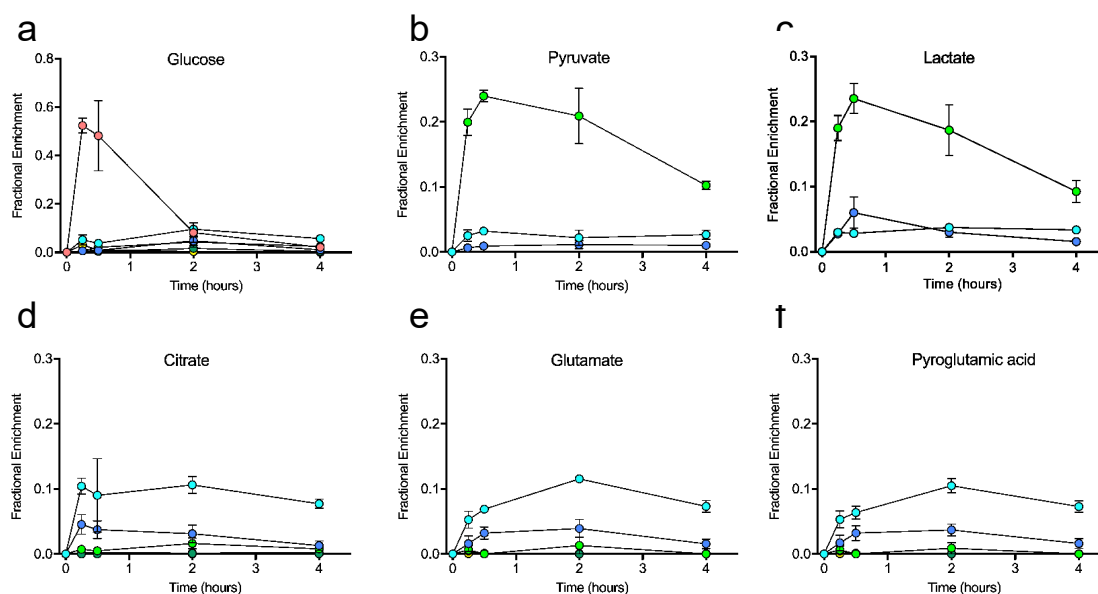

**Figure S1.** Enrichment of  $^{13}\text{C}$  from glucose in plasma metabolites. Time course of labeled isotopologues from plasma at 15 min, 30 min, 2 h, and 4 h post-gavage. (a–f) Fractional enrichment of glucose (a), pyruvate (b), lactate (c), citrate (d), Glu (e), and pyroglutamic acid (f). Values shown are mean  $\pm$  SEM ( $n = 2-5$ ).

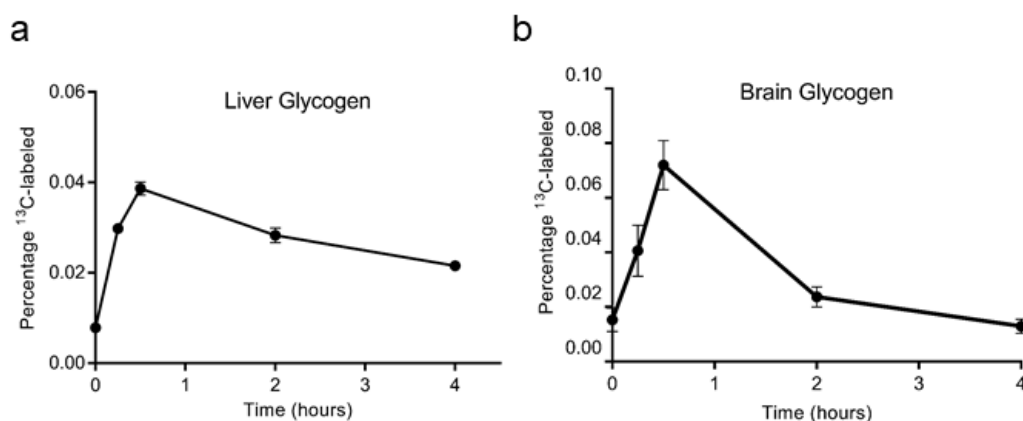

**Figure S2.**  $[\text{U-}^{13}\text{C}]$  Glucose incorporation into liver glycogen. Time course showing percentage of  $[\text{U-}^{13}\text{C}]$  glucose enrichment into liver glycogen (a) and brain glycogen (b) at 15 min, 30 min, 2 h, and 4 h post-gavage. Values shown are mean  $\pm$  SEM ( $n = 3-5$ ).

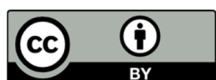

Supplement: s1 [file s1]
